# Supplementary material for: Identification and Analysis of lncRNA and circRNA Related to Wheat Grain Development
Source: Int J Mol Sci. 2024 May 17;25(10):5484. doi: 10.3390/ijms25105484 (PMC11122269; doi:10.3390/ijms25105484)
Supplement: Supplementary file 1 [file ijms-25-05484-s001.zip › Table.S1.xlsx]

## Sheet: Sheet1
Table.S1 MiRNAs that interact with lncRNA and circRNA.
lncRNA	p134_10d vs p25_10d	lncRNA_id	BaseMean	lfcSE	stat	FoldChange	log2FoldChange	pValue	qValue	Expression_P25_10d1	Expression_P25_10d2	Expression_P134_10d1	Expression_P134_10d2	Chrom	Start	End	Strand	pathway_description	lncRNA_symbol	partnerRNA_transcript	distance	direction	type	location	subtype	partnerRNA_gene	Dbxref	gene	product	GO_id	GO_term	pathway
		TCONS_00066149	63.5407	0.747587	0.713367	1.44724	0.533304	0.475618	0.663208	13.5611	6.60222	11.3814	22.2676	Chr7A	35383080	35383978	-		XLOC_051413	TraesCS7A03G0149600.1	24899	sense	intergenic	downstream	same_strand	TraesCS7A03G0149600.1	hypothetical protein CFC21_095635 [Triticum aestivum]		F-box-like|F-box domain
	p134_20d vs p25_20d	lncRNA_id	BaseMean	lfcSE	stat	FoldChange	log2FoldChange	pValue	qValue	Expression_P25_20d1	Expression_P25_20d2	Expression_P134_20d1	Expression_P134_20d2	Chrom	Start	End	Strand	pathway_description	lncRNA_symbol	partnerRNA_transcript	distance	direction	type	location	subtype	partnerRNA_gene	Dbxref	gene	product	GO_id	GO_term	pathway
		TCONS_00066149	52.2197	0.756448	-0.757966	0.672049	-0.573362	0.448471	0.629702	7.88478	6.73124	7.47966	4.11028	Chr7A	35383080	35383978	-		XLOC_051413	TraesCS7A03G0149600.1	24899	sense	intergenic	downstream	same_strand	TraesCS7A03G0149600.1	hypothetical protein CFC21_095635 [Triticum aestivum]		F-box-like|F-box domain
	p134_30d vs p25_30d	lncRNA_id	BaseMean	lfcSE	stat	FoldChange	log2FoldChange	pValue	qValue	Expression_P25_30d1	Expression_P25_30d2	Expression_P134_30d1	Expression_P134_30d2	Chrom	Start	End	Strand	pathway_description	lncRNA_symbol	partnerRNA_transcript	distance	direction	type	location	subtype	partnerRNA_gene	Dbxref	gene	product	GO_id	GO_term	pathway
		TCONS_00066149	66.105	0.613227	0.838048	1.42792	0.513914	0.402004	0.624403	9.87864	7.95263	13.4097	11.1204	Chr7A	35383080	35383978	-		XLOC_051413	TraesCS7A03G0149600.1	24899	sense	intergenic	downstream	same_strand	TraesCS7A03G0149600.1	hypothetical protein CFC21_095635 [Triticum aestivum]		F-box-like|F-box domain
	p134_30d vs p134_10d	lncRNA_id	BaseMean	lfcSE	stat	FoldChange	log2FoldChange	pValue	qValue	Expression_P134_10d1	Expression_P134_10d2	Expression_P134_30d1	Expression_P134_30d2	Chrom	Start	End	Strand	pathway_description	lncRNA_symbol	partnerRNA_transcript	distance	direction	type	location	subtype	partnerRNA_gene	Dbxref	gene	product	GO_id	GO_term	pathway
		TCONS_00066149	79.4983	0.660624	0.265719	1.12939	0.17554	0.790456	0.864651	11.3814	22.2676	13.4097	11.1204	Chr7A	35383080	35383978	-		XLOC_051413	TraesCS7A03G0149600.1	24899	sense	intergenic	downstream	same_strand	TraesCS7A03G0149600.1	hypothetical protein CFC21_095635 [Triticum aestivum]		F-box-like|F-box domain
	p134_30d vs p134_20d	lncRNA_id	BaseMean	lfcSE	stat	FoldChange	log2FoldChange	pValue	qValue	Expression_P134_20d1	Expression_P134_20d2	Expression_P134_30d1	Expression_P134_30d2	Chrom	Start	End	Strand	pathway_description	lncRNA_symbol	partnerRNA_transcript	distance	direction	type	location	subtype	partnerRNA_gene	Dbxref	gene	product	GO_id	GO_term	pathway
		TCONS_00066149	62.6931	0.762022	1.47306	2.17725	1.1225	0.140735	0.334234	7.47966	4.11028	13.4097	11.1204	Chr7A	35383080	35383978	-		XLOC_051413	TraesCS7A03G0149600.1	24899	sense	intergenic	downstream	same_strand	TraesCS7A03G0149600.1	hypothetical protein CFC21_095635 [Triticum aestivum]		F-box-like|F-box domain
	p134_10d vs p134_20d	lncRNA_id	BaseMean	lfcSE	stat	FoldChange	log2FoldChange	pValue	qValue	Expression_P134_10d1	Expression_P134_10d2	Expression_P134_20d1	Expression_P134_20d2	Chrom	Start	End	Strand	pathway_description	lncRNA_symbol	partnerRNA_transcript	distance	direction	type	location	subtype	partnerRNA_gene	Dbxref	gene	product	GO_id	GO_term	pathway
		TCONS_00066149	60.3361	0.789745	-1.08729	0.551457	-0.858679	0.27691	0.439338	11.3814	22.2676	7.47966	4.11028	Chr7A	35383080	35383978	-		XLOC_051413	TraesCS7A03G0149600.1	24899	sense	intergenic	downstream	same_strand	TraesCS7A03G0149600.1	hypothetical protein CFC21_095635 [Triticum aestivum]		F-box-like|F-box domain
	p25_10d vs p25_20d	lncRNA_id	BaseMean	lfcSE	stat	FoldChange	log2FoldChange	pValue	qValue	Expression_P25_10d1	Expression_P25_10d2	Expression_P25_20d1	Expression_P25_20d2	Chrom	Start	End	Strand	pathway_description	lncRNA_symbol	partnerRNA_transcript	distance	direction	type	location	subtype	partnerRNA_gene	Dbxref	gene	product	GO_id	GO_term	pathway
		TCONS_00066149	55.6759	0.743894	0.316755	1.17742	0.235632	0.75143	0.847952	13.5611	6.60222	7.88478	6.73124	Chr7A	35383080	35383978	-		XLOC_051413	TraesCS7A03G0149600.1	24899	sense	intergenic	downstream	same_strand	TraesCS7A03G0149600.1	hypothetical protein CFC21_095635 [Triticum aestivum]		F-box-like|F-box domain
	p25_10d vs p25_30d	lncRNA_id	BaseMean	lfcSE	stat	FoldChange	log2FoldChange	pValue	qValue	Expression_P25_10d1	Expression_P25_10d2	Expression_P25_30d1	Expression_P25_30d2	Chrom	Start	End	Strand	pathway_description	lncRNA_symbol	partnerRNA_transcript	distance	direction	type	location	subtype	partnerRNA_gene	Dbxref	gene	product	GO_id	GO_term	pathway
		TCONS_00066149	51.2304	0.761617	0.240719	1.13551	0.183336	0.809773	0.874199	13.5611	6.60222	9.87864	7.95263	Chr7A	35383080	35383978	-		XLOC_051413	TraesCS7A03G0149600.1	24899	sense	intergenic	downstream	same_strand	TraesCS7A03G0149600.1	hypothetical protein CFC21_095635 [Triticum aestivum]		F-box-like|F-box domain
	p25_20d vs p25_30d	lncRNA_id	BaseMean	lfcSE	stat	FoldChange	log2FoldChange	pValue	qValue	Expression_P25_20d1	Expression_P25_20d2	Expression_P25_30d1	Expression_P25_30d2	Chrom	Start	End	Strand	pathway_description	lncRNA_symbol	partnerRNA_transcript	distance	direction	type	location	subtype	partnerRNA_gene	Dbxref	gene	product	GO_id	GO_term	pathway
		TCONS_00066149	57.5226	0.652714	0.0176461	1.00802	0.0115179	0.985921	0.994157	7.88478	6.73124	9.87864	7.95263	Chr7A	35383080	35383978	-		XLOC_051413	TraesCS7A03G0149600.1	24899	sense	intergenic	downstream	same_strand	TraesCS7A03G0149600.1	hypothetical protein CFC21_095635 [Triticum aestivum]		F-box-like|F-box domain
circRNA	p134_10d vs p25_10d	miRNA	circRNA	case_value	control_value	FoldChange	log2FoldChange	z-score	pValue	qValue	Expression_P25_10d1	Expression_P25_10d2	Expression_P134_10d1	Expression_P134_10d2	genomic_length	circRNA_length	type	best.transcript	transcript_position	Description	Swissprot.id	Swissprot.annotation	KEGG.id	KO_id	gene	KEGG.description	pathway	pathway_description	COG.id	COG.defination	COG.code	COG.categories	COG.class	KOG.id	KOG.defination	KOG.code	KOG.categories	KOG.class	eggNOG.abbreviation	eggNOG.id	eggNOG.description	GO_dtabase	GO_id	GO_term	Pfam.IDs	Pfam.Description
		1120a	circRNA_0957|Chr2B:811045021_811094734_+	47.5851	23.9443	1.67519	0.744322	2.12439	0.0336376	0.0343073	23.9443	0	47.5851	0	49714	49714	sense-overlapping	TraesCS2B03G1568900.1	Chr2B:811042584_811045390_+	uncharacterized protein LOC119366640 [Triticum dicoccoides]	--	--	--	--	--	--	--	--	--	--	--	--	--	--	--	--	--	--	S	ENOG41100C3	Protein of unknown function (DUF3727)	--	--	--	PF12527.8	Protein of unknown function (DUF3727)
		1120a	circRNA_2309|Chr7D:608011186_608088547_+	0	71.8329	0.00586734	-7.41308	-8.91168	5.02629e-19	8.22861e-18	71.8329	0	0	0	77362	76943	sense-overlapping	TraesCS7D03G1181400.1	Chr7D:608008579_608012537_+	lysosomal Pro-X carboxypeptidase-like [Aegilops tauschii subsp. tauschii]	Q1PF50|EDA2_ARATH	Probable serine protease EDA2 T27K22.5 OS=Arabidopsis thaliana (Mouse-ear cress) GN=EDA2,At2g18080,T27K22.5 PE=2 SV=2	--	--	--	--	--	--	--	--	--	--	--	KOG2183	Prolylcarboxypeptidase (angiotensinase C)	[OR]	CELLULAR PROCESSES AND SIGNALING|POORLY CHARACTERIZED	Posttranslational modification, protein turnover, chaperones |General function prediction only	S	ENOG410Y38A	Lysosomal Pro-X	Cellular Component: extracellular region (GO:0005576);|Cellular Component: vacuole (GO:0005773);|Biological Process: proteolysis (GO:0006508);|Molecular Function: serine-type peptidase activity (GO:0008236);|Molecular Function: dipeptidyl-peptidase activity (GO:0008239);|Biological Process: megagametogenesis (GO:0009561);	GO:0005576,GO:0005773,GO:0006508,GO:0008236,GO:0008239,GO:0009561	Cellular Component: extracellular region|Cellular Component: vacuole|Biological Process: proteolysis|Molecular Function: serine-type peptidase activity|Molecular Function: dipeptidyl-peptidase activity|Biological Process: megagametogenesis	PF05577.12	Serine carboxypeptidase S28
		1120a	circRNA_1041|Chr3A:32362161_32362549_+	33.0474	0	55.7137	5.79996	5.7422	9.34562e-09	2.69834e-08	0	0	0	33.0474	389	389	sense-overlapping	TraesCS3A03G0112800.1	Chr3A:32361908_32368399_+	hypothetical protein CFC21_033767 [Triticum aestivum]	O42895|YBQ2_SCHPO	Uncharacterized protein C115.02c SPBC115.02c OS=Schizosaccharomyces pombe (strain 972 / ATCC 24843) (Fission yeast) GN=.,.,SPBC115.02c PE=3 SV=1	--	--	--	--	--	--	COG1485	Predicted ATPase	[R]	POORLY CHARACTERIZED	General function prediction only	KOG2383	Predicted ATPase	[R]	POORLY CHARACTERIZED	General function prediction only	S	COG1485	AFG1 family ATPase	Molecular Function: ATP binding (GO:0005524);|Cellular Component: cytoplasm (GO:0005737);|Cellular Component: mitochondrion (GO:0005739);|Biological Process: protein quality control for misfolded or incompletely synthesized proteins (GO:0006515);|Biological Process: protein import into peroxisome matrix (GO:0016558);|Molecular Function: ATPase activity (GO:0016887);|Biological Process: proteolysi…	GO:0005524,GO:0005737,GO:0005739,GO:0006515,GO:0016558,GO:0016887,GO:0051603	Molecular Function: ATP binding|Cellular Component: cytoplasm|Cellular Component: mitochondrion|Biological Process: protein quality control for misfolded or incompletely synthesized proteins|Biological Process: protein import into peroxisome matrix|Molecular Function: ATPase activity|Biological Process: proteolysis involved in cellular protein catabolic process	PF03969.16	AFG1-like ATPase
		1130a	circRNA_2127|Chr7A:730459110_730487308_+	77.1106	0	129.999	7.02235	8.59296	8.47572e-18	1.17039e-16	0	0	0	77.1106	28199	27766	sense-overlapping	TraesCS7A03G1337400.1	Chr7A:730486157_730487677_+	catalase 3 [Triticum aestivum]	P55307|CATA1_HORVU	Catalase isozyme 1 CAT1 OS=Hordeum vulgare (Barley) GN=CAT1,.,. PE=2 SV=1	277/327(84.71)	K03781	katE, CAT, catB, srpA	catalase [EC:1.11.1.6]	ko00380|ko00630|ko04016|ko04146	Tryptophan metabolism|Glyoxylate and dicarboxylate metabolism|MAPK signaling pathway - plant|Peroxisome	COG0753	Catalase	[P]	METABOLISM	Inorganic ion transport and metabolism	KOG0047	Catalase	[P]	METABOLISM	Inorganic ion transport and metabolism	P	COG0753	Catalase	Molecular Function: catalase activity (GO:0004096);|Biological Process: response to oxidative stress (GO:0006979);|Cellular Component: glyoxysome (GO:0009514);|Molecular Function: heme binding (GO:0020037);|Biological Process: hydrogen peroxide catabolic process (GO:0042744);|Molecular Function: metal ion binding (GO:0046872);	GO:0004096,GO:0006979,GO:0009514,GO:0020037,GO:0042744,GO:0046872	Molecular Function: catalase activity|Biological Process: response to oxidative stress|Cellular Component: glyoxysome|Molecular Function: heme binding|Biological Process: hydrogen peroxide catabolic process|Molecular Function: metal ion binding	PF00199.19,PF06628.12	Catalase|Catalase-related immune-responsive
	p134_20d vs p25_20d	miRNA	circRNA	case_value	control_value	FoldChange	log2FoldChange	z-score	pValue	qValue	Expression_P25_20d1	Expression_P25_20d2	Expression_P134_20d1	Expression_P134_20d2	genomic_length	circRNA_length	type	best.transcript	transcript_position	Description	Swissprot.id	Swissprot.annotation	KEGG.id	KO_id	gene	KEGG.description	pathway	pathway_description	COG.id	COG.defination	COG.code	COG.categories	COG.class	KOG.id	KOG.defination	KOG.code	KOG.categories	KOG.class	eggNOG.abbreviation	eggNOG.id	eggNOG.description	GO_dtabase	GO_id	GO_term	Pfam.IDs	Pfam.Description
		1122a	circRNA_1606|Chr5A:504372471_504384228_-	0	198.671	0.000909214	-10.1031	-16.6361	3.81389e-62	1.23615e-60	93.5115	105.159	0	0	11758	11171	sense-overlapping	TraesCS5A03G0720200.1	Chr5A:504382303_504387387_-	Beta-glucosidase 31 [Triticum urartu]	B7F7K7|BGL31_ORYSJ	Beta-glucosidase 31 OsJ_29984 OS=Oryza sativa subsp. japonica (Rice) GN=BGLU31,Os09g0511600,OsJ_29984 PE=2 SV=1	465/488(95.29)	K01188	E3.2.1.21	beta-glucosidase [EC:3.2.1.21]	ko00460|ko00500|ko00940	Cyanoamino acid metabolism|Starch and sucrose metabolism|Phenylpropanoid biosynthesis	COG2723	Beta-glucosidase/6-phospho-beta-glucosidase/beta-galactosidase	[G]	METABOLISM	Carbohydrate transport and metabolism	KOG0626	Beta-glucosidase, lactase phlorizinhydrolase, and related proteins	[G]	METABOLISM	Carbohydrate transport and metabolism	G	COG2723	beta-glucosidase	Biological Process: carbohydrate metabolic process (GO:0005975);|Molecular Function: beta-glucosidase activity (GO:0008422);|Molecular Function: scopolin beta-glucosidase activity (GO:0102483);	GO:0005975,GO:0008422,GO:0102483	Biological Process: carbohydrate metabolic process|Molecular Function: beta-glucosidase activity|Molecular Function: scopolin beta-glucosidase activity	PF00232.18	Glycosyl hydrolase family 1
		1122a	circRNA_0957|Chr2B:811045021_811094734_+	0	17.5265	0.0103063	-6.60032	-5.92305	3.16029e-09	6.00974e-09	0	17.5265	0	0	49714	49714	sense-overlapping	TraesCS2B03G1568900.1	Chr2B:811042584_811045390_+	uncharacterized protein LOC119366640 [Triticum dicoccoides]	--	--	--	--	--	--	--	--	--	--	--	--	--	--	--	--	--	--	S	ENOG41100C3	Protein of unknown function (DUF3727)	--	--	--	PF12527.8	Protein of unknown function (DUF3727)
		1130a	circRNA_0587|Chr1D:367295343_367302752_-	20.8039	0	15.0316	3.90993	3.66236	0.000249901	0.000325713	0	0	20.8039	0	7410	7410	sense-overlapping	TraesCS1D03G0646900.1	Chr1D:367287135_367295407_-	protein NRT1/ PTR FAMILY 5.10-like isoform X1 [Aegilops tauschii subsp. tauschii]	Q0WP01|PTR9_ARATH	Protein NRT1/ PTR FAMILY 5.10 F12K8.12 OS=Arabidopsis thaliana (Mouse-ear cress) GN=NPF5.10,At1g22540,F12K8.12 PE=2 SV=1	--	--	--	--	--	--	COG3104	Dipeptide/tripeptide permease	[E]	METABOLISM	Amino acid transport and metabolism	KOG1237	H+/oligopeptide symporter	[E]	METABOLISM	Amino acid transport and metabolism	E	COG3104	transporter	Molecular Function: peptide:proton symporter activity (GO:0015333);|Cellular Component: integral component of membrane (GO:0016021);|Molecular Function: oligopeptide transmembrane transporter activity (GO:0035673);|Molecular Function: peptide transmembrane transporter activity (GO:1904680);	GO:0015333,GO:0016021,GO:0035673,GO:1904680	Molecular Function: peptide:proton symporter activity|Cellular Component: integral component of membrane|Molecular Function: oligopeptide transmembrane transporter activity|Molecular Function: peptide transmembrane transporter activity	PF00854.21,PF07690.16	POT family|Major Facilitator Superfamily
	p134_30d vs p25_30d	miRNA	circRNA	case_value	control_value	FoldChange	log2FoldChange	z-score	pValue	qValue	Expression_P25_30d1	Expression_P25_30d2	Expression_P134_30d1	Expression_P134_30d2	genomic_length	circRNA_length	type	best.transcript	transcript_position	Description	Swissprot.id	Swissprot.annotation	KEGG.id	KO_id	gene	KEGG.description	pathway	pathway_description	COG.id	COG.defination	COG.code	COG.categories	COG.class	KOG.id	KOG.defination	KOG.code	KOG.categories	KOG.class	eggNOG.abbreviation	eggNOG.id	eggNOG.description	GO_dtabase	GO_id	GO_term	Pfam.IDs	Pfam.Description
		1122a	circRNA_1606|Chr5A:504372471_504384228_-	41.9862	271.396	0.0542368	-4.20458	-22.7453	1.59692e-114	1.46118e-112	139.743	131.653	0	41.9862	11758	11171	sense-overlapping	TraesCS5A03G0720200.1	Chr5A:504382303_504387387_-	Beta-glucosidase 31 [Triticum urartu]	B7F7K7|BGL31_ORYSJ	Beta-glucosidase 31 OsJ_29984 OS=Oryza sativa subsp. japonica (Rice) GN=BGLU31,Os09g0511600,OsJ_29984 PE=2 SV=1	465/488(95.29)	K01188	E3.2.1.21	beta-glucosidase [EC:3.2.1.21]	ko00460|ko00500|ko00940	Cyanoamino acid metabolism|Starch and sucrose metabolism|Phenylpropanoid biosynthesis	COG2723	Beta-glucosidase/6-phospho-beta-glucosidase/beta-galactosidase	[G]	METABOLISM	Carbohydrate transport and metabolism	KOG0626	Beta-glucosidase, lactase phlorizinhydrolase, and related proteins	[G]	METABOLISM	Carbohydrate transport and metabolism	G	COG2723	beta-glucosidase	Biological Process: carbohydrate metabolic process (GO:0005975);|Molecular Function: beta-glucosidase activity (GO:0008422);|Molecular Function: scopolin beta-glucosidase activity (GO:0102483);	GO:0005975,GO:0008422,GO:0102483	Biological Process: carbohydrate metabolic process|Molecular Function: beta-glucosidase activity|Molecular Function: scopolin beta-glucosidase activity	PF00232.18	Glycosyl hydrolase family 1
		1122a	circRNA_0957|Chr2B:811045021_811094734_+	0	21.9422	0.00798878	-6.96781	-6.63776	3.18494e-11	6.86371e-11	0	21.9422	0	0	49714	49714	sense-overlapping	TraesCS2B03G1568900.1	Chr2B:811042584_811045390_+	uncharacterized protein LOC119366640 [Triticum dicoccoides]	--	--	--	--	--	--	--	--	--	--	--	--	--	--	--	--	--	--	S	ENOG41100C3	Protein of unknown function (DUF3727)	--	--	--	PF12527.8	Protein of unknown function (DUF3727)
		1122a	circRNA_1938|Chr6B:449321369_449325235_-	0	46.581	0.00376316	-8.05384	-9.26109	2.02365e-20	1.48626e-19	46.581	0	0	0	3867	3867	sense-overlapping	TraesCS6B03G0728300.1	Chr6B:449322599_449322880_-	unnamed protein product [Triticum turgidum subsp. durum]	B5X0I6|VIP6_ARATH	Protein CTR9 homolog At2g06210 OS=Arabidopsis thaliana (Mouse-ear cress) GN=VIP6,At2g06210,. PE=1 SV=1	--	--	--	--	--	--	--	--	--	--	--	KOG2002	TPR-containing nuclear phosphoprotein that regulates K(+) uptake	[P]	METABOLISM	Inorganic ion transport and metabolism	S	COG0457	repeat-containing protein	Molecular Function: RNA polymerase II complex binding (GO:0000993);|Cellular Component: nucleus (GO:0005634);|Biological Process: flower development (GO:0009908);|Biological Process: negative regulation of flower development (GO:0009910);|Cellular Component: membrane (GO:0016020);|Biological Process: histone methylation (GO:0016571);|Cellular Component: Cdc73/Paf1 complex (GO:0016593);|Biological…	GO:0000993,GO:0005634,GO:0009908,GO:0009910,GO:0016020,GO:0016571,GO:0016593,GO:0045893,GO:0051569	Molecular Function: RNA polymerase II complex binding|Cellular Component: nucleus|Biological Process: flower development|Biological Process: negative regulation of flower development|Cellular Component: membrane|Biological Process: histone methylation|Cellular Component: Cdc73/Paf1 complex|Biological Process: positive regulation of transcription, DNA-templated|Biological Process: regulation of hi…	--	--
		1130a	circRNA_0586|Chr1D:367294993_367308917_-	0	34.9357	0.00501755	-7.6388	-8.17426	2.97677e-16	1.42108e-15	34.9357	0	0	0	13925	13813	sense-overlapping	TraesCS1D03G0646900.1	Chr1D:367287135_367295407_-	protein NRT1/ PTR FAMILY 5.10-like isoform X1 [Aegilops tauschii subsp. tauschii]	Q0WP01|PTR9_ARATH	Protein NRT1/ PTR FAMILY 5.10 F12K8.12 OS=Arabidopsis thaliana (Mouse-ear cress) GN=NPF5.10,At1g22540,F12K8.12 PE=2 SV=1	--	--	--	--	--	--	COG3104	Dipeptide/tripeptide permease	[E]	METABOLISM	Amino acid transport and metabolism	KOG1237	H+/oligopeptide symporter	[E]	METABOLISM	Amino acid transport and metabolism	E	COG3104	transporter	Molecular Function: peptide:proton symporter activity (GO:0015333);|Cellular Component: integral component of membrane (GO:0016021);|Molecular Function: oligopeptide transmembrane transporter activity (GO:0035673);|Molecular Function: peptide transmembrane transporter activity (GO:1904680);	GO:0015333,GO:0016021,GO:0035673,GO:1904680	Molecular Function: peptide:proton symporter activity|Cellular Component: integral component of membrane|Molecular Function: oligopeptide transmembrane transporter activity|Molecular Function: peptide transmembrane transporter activity	PF00854.21,PF07690.16	POT family|Major Facilitator Superfamily
		1130a	circRNA_0587|Chr1D:367295343_367302752_-	49.2371	0	34.5234	5.1095	5.95743	2.56239e-09	4.68137e-09	0	0	49.2371	0	7410	7410	sense-overlapping	TraesCS1D03G0646900.1	Chr1D:367287135_367295407_-	protein NRT1/ PTR FAMILY 5.10-like isoform X1 [Aegilops tauschii subsp. tauschii]	Q0WP01|PTR9_ARATH	Protein NRT1/ PTR FAMILY 5.10 F12K8.12 OS=Arabidopsis thaliana (Mouse-ear cress) GN=NPF5.10,At1g22540,F12K8.12 PE=2 SV=1	--	--	--	--	--	--	COG3104	Dipeptide/tripeptide permease	[E]	METABOLISM	Amino acid transport and metabolism	KOG1237	H+/oligopeptide symporter	[E]	METABOLISM	Amino acid transport and metabolism	E	COG3104	transporter	Molecular Function: peptide:proton symporter activity (GO:0015333);|Cellular Component: integral component of membrane (GO:0016021);|Molecular Function: oligopeptide transmembrane transporter activity (GO:0035673);|Molecular Function: peptide transmembrane transporter activity (GO:1904680);	GO:0015333,GO:0016021,GO:0035673,GO:1904680	Molecular Function: peptide:proton symporter activity|Cellular Component: integral component of membrane|Molecular Function: oligopeptide transmembrane transporter activity|Molecular Function: peptide transmembrane transporter activity	PF00854.21,PF07690.16	POT family|Major Facilitator Superfamily
		1130a	circRNA_2127|Chr7A:730459110_730487308_+	41.9862	0	29.4393	4.87967	5.46731	4.56907e-08	8.0398e-08	0	0	0	41.9862	28199	27766	sense-overlapping	TraesCS7A03G1337400.1	Chr7A:730486157_730487677_+	catalase 3 [Triticum aestivum]	P55307|CATA1_HORVU	Catalase isozyme 1 CAT1 OS=Hordeum vulgare (Barley) GN=CAT1,.,. PE=2 SV=1	277/327(84.71)	K03781	katE, CAT, catB, srpA	catalase [EC:1.11.1.6]	ko00380|ko00630|ko04016|ko04146	Tryptophan metabolism|Glyoxylate and dicarboxylate metabolism|MAPK signaling pathway - plant|Peroxisome	COG0753	Catalase	[P]	METABOLISM	Inorganic ion transport and metabolism	KOG0047	Catalase	[P]	METABOLISM	Inorganic ion transport and metabolism	P	COG0753	Catalase	Molecular Function: catalase activity (GO:0004096);|Biological Process: response to oxidative stress (GO:0006979);|Cellular Component: glyoxysome (GO:0009514);|Molecular Function: heme binding (GO:0020037);|Biological Process: hydrogen peroxide catabolic process (GO:0042744);|Molecular Function: metal ion binding (GO:0046872);	GO:0004096,GO:0006979,GO:0009514,GO:0020037,GO:0042744,GO:0046872	Molecular Function: catalase activity|Biological Process: response to oxidative stress|Cellular Component: glyoxysome|Molecular Function: heme binding|Biological Process: hydrogen peroxide catabolic process|Molecular Function: metal ion binding	PF00199.19,PF06628.12	Catalase|Catalase-related immune-responsive
		1130a	circRNA_0750|Chr2A:20012686_20098308_-	71.5285	0	50.1534	5.64828	7.23009	4.82664e-13	1.76361e-12	0	0	29.5423	41.9862	85623	82397	sense-overlapping	TraesCS2A03G0080300.1	Chr2A:20094442_20108697_-	hypothetical protein CFC21_014753 [Triticum aestivum]	Q9FGF0|PGML1_ARATH	Phosphoglycerate mutase-like protein 1 T12B11.5 OS=Arabidopsis thaliana (Mouse-ear cress) GN=.,At5g64460,T12B11.5 PE=2 SV=1	--	--	--	--	--	--	COG0406	Fructose-2,6-bisphosphatase	[G]	METABOLISM	Carbohydrate transport and metabolism	KOG4754	Predicted phosphoglycerate mutase	[G]	METABOLISM	Carbohydrate transport and metabolism	S	ENOG4111QJY	Phosphoglycerate mutase	Cellular Component: cytosol (GO:0005829);	GO:0005829	Cellular Component: cytosol	PF00300.22	Histidine phosphatase superfamily (branch 1)
	p134_10d vs p134_20d	miRNA	circRNA	case_value	control_value	FoldChange	log2FoldChange	z-score	pValue	qValue	Expression_P134_10d1	Expression_P134_10d2	Expression_P134_20d1	Expression_P134_20d2	genomic_length	circRNA_length	type	best.transcript	transcript_position	Description	Swissprot.id	Swissprot.annotation	KEGG.id	KO_id	gene	KEGG.description	pathway	pathway_description	COG.id	COG.defination	COG.code	COG.categories	COG.class	KOG.id	KOG.defination	KOG.code	KOG.categories	KOG.class	eggNOG.abbreviation	eggNOG.id	eggNOG.description	GO_dtabase	GO_id	GO_term	Pfam.IDs	Pfam.Description
		1122a	circRNA_0957|Chr2B:811045021_811094734_+	0	47.5851	0.00145087	-9.42887	-12.6308	1.42896e-36	1.70943e-35	47.5851	0	0	0	49714	49714	sense-overlapping	TraesCS2B03G1568900.1	Chr2B:811042584_811045390_+	uncharacterized protein LOC119366640 [Triticum dicoccoides]	--	--	--	--	--	--	--	--	--	--	--	--	--	--	--	--	--	--	S	ENOG41100C3	Protein of unknown function (DUF3727)	--	--	--	PF12527.8	Protein of unknown function (DUF3727)
		1122a	circRNA_1041|Chr3A:32362161_32362549_+	0	33.0474	0.00208911	-8.9029	-10.8872	1.32664e-27	7.71936e-27	0	33.0474	0	0	389	389	sense-overlapping	TraesCS3A03G0112800.1	Chr3A:32361908_32368399_+	hypothetical protein CFC21_033767 [Triticum aestivum]	O42895|YBQ2_SCHPO	Uncharacterized protein C115.02c SPBC115.02c OS=Schizosaccharomyces pombe (strain 972 / ATCC 24843) (Fission yeast) GN=.,.,SPBC115.02c PE=3 SV=1	--	--	--	--	--	--	COG1485	Predicted ATPase	[R]	POORLY CHARACTERIZED	General function prediction only	KOG2383	Predicted ATPase	[R]	POORLY CHARACTERIZED	General function prediction only	S	COG1485	AFG1 family ATPase	Molecular Function: ATP binding (GO:0005524);|Cellular Component: cytoplasm (GO:0005737);|Cellular Component: mitochondrion (GO:0005739);|Biological Process: protein quality control for misfolded or incompletely synthesized proteins (GO:0006515);|Biological Process: protein import into peroxisome matrix (GO:0016558);|Molecular Function: ATPase activity (GO:0016887);|Biological Process: proteolysi…	GO:0005524,GO:0005737,GO:0005739,GO:0006515,GO:0016558,GO:0016887,GO:0051603	Molecular Function: ATP binding|Cellular Component: cytoplasm|Cellular Component: mitochondrion|Biological Process: protein quality control for misfolded or incompletely synthesized proteins|Biological Process: protein import into peroxisome matrix|Molecular Function: ATPase activity|Biological Process: proteolysis involved in cellular protein catabolic process	PF03969.16	AFG1-like ATPase
		1130a	circRNA_0587|Chr1D:367295343_367302752_-	20.8039	0	5.74518	2.52235	2.74752	0.00600481	0.00784617	0	0	20.8039	0	7410	7410	sense-overlapping	TraesCS1D03G0646900.1	Chr1D:367287135_367295407_-	protein NRT1/ PTR FAMILY 5.10-like isoform X1 [Aegilops tauschii subsp. tauschii]	Q0WP01|PTR9_ARATH	Protein NRT1/ PTR FAMILY 5.10 F12K8.12 OS=Arabidopsis thaliana (Mouse-ear cress) GN=NPF5.10,At1g22540,F12K8.12 PE=2 SV=1	--	--	--	--	--	--	COG3104	Dipeptide/tripeptide permease	[E]	METABOLISM	Amino acid transport and metabolism	KOG1237	H+/oligopeptide symporter	[E]	METABOLISM	Amino acid transport and metabolism	E	COG3104	transporter	Molecular Function: peptide:proton symporter activity (GO:0015333);|Cellular Component: integral component of membrane (GO:0016021);|Molecular Function: oligopeptide transmembrane transporter activity (GO:0035673);|Molecular Function: peptide transmembrane transporter activity (GO:1904680);	GO:0015333,GO:0016021,GO:0035673,GO:1904680	Molecular Function: peptide:proton symporter activity|Cellular Component: integral component of membrane|Molecular Function: oligopeptide transmembrane transporter activity|Molecular Function: peptide transmembrane transporter activity	PF00854.21,PF07690.16	POT family|Major Facilitator Superfamily
		1130a	circRNA_2127|Chr7A:730459110_730487308_+	0	77.1106	0.000895333	-10.1253	-15.3035	7.24563e-53	1.78911e-51	0	77.1106	0	0	28199	27766	sense-overlapping	TraesCS7A03G1337400.1	Chr7A:730486157_730487677_+	catalase 3 [Triticum aestivum]	P55307|CATA1_HORVU	Catalase isozyme 1 CAT1 OS=Hordeum vulgare (Barley) GN=CAT1,.,. PE=2 SV=1	277/327(84.71)	K03781	katE, CAT, catB, srpA	catalase [EC:1.11.1.6]	ko00380|ko00630|ko04016|ko04146	Tryptophan metabolism|Glyoxylate and dicarboxylate metabolism|MAPK signaling pathway - plant|Peroxisome	COG0753	Catalase	[P]	METABOLISM	Inorganic ion transport and metabolism	KOG0047	Catalase	[P]	METABOLISM	Inorganic ion transport and metabolism	P	COG0753	Catalase	Molecular Function: catalase activity (GO:0004096);|Biological Process: response to oxidative stress (GO:0006979);|Cellular Component: glyoxysome (GO:0009514);|Molecular Function: heme binding (GO:0020037);|Biological Process: hydrogen peroxide catabolic process (GO:0042744);|Molecular Function: metal ion binding (GO:0046872);	GO:0004096,GO:0006979,GO:0009514,GO:0020037,GO:0042744,GO:0046872	Molecular Function: catalase activity|Biological Process: response to oxidative stress|Cellular Component: glyoxysome|Molecular Function: heme binding|Biological Process: hydrogen peroxide catabolic process|Molecular Function: metal ion binding	PF00199.19,PF06628.12	Catalase|Catalase-related immune-responsive
	p134_30d vs p134_20d	miRNA	circRNA	case_value	control_value	FoldChange	log2FoldChange	z-score	pValue	qValue	Expression_P134_20d1	Expression_P134_20d2	Expression_P134_30d1	Expression_P134_30d2	genomic_length	circRNA_length	type	best.transcript	transcript_position	Description	Swissprot.id	Swissprot.annotation	KEGG.id	KO_id	gene	KEGG.description	pathway	pathway_description	COG.id	COG.defination	COG.code	COG.categories	COG.class	KOG.id	KOG.defination	KOG.code	KOG.categories	KOG.class	eggNOG.abbreviation	eggNOG.id	eggNOG.description	GO_dtabase	GO_id	GO_term	Pfam.IDs	Pfam.Description
		1122a	circRNA_1606|Chr5A:504372471_504384228_-	41.9862	0	81.2221	6.3438	6.65599	2.81397e-11	1.7959e-10	0	0	0	41.9862	11758	11171	sense-overlapping	TraesCS5A03G0720200.1	Chr5A:504382303_504387387_-	Beta-glucosidase 31 [Triticum urartu]	B7F7K7|BGL31_ORYSJ	Beta-glucosidase 31 OsJ_29984 OS=Oryza sativa subsp. japonica (Rice) GN=BGLU31,Os09g0511600,OsJ_29984 PE=2 SV=1	465/488(95.29)	K01188	E3.2.1.21	beta-glucosidase [EC:3.2.1.21]	ko00460|ko00500|ko00940	Cyanoamino acid metabolism|Starch and sucrose metabolism|Phenylpropanoid biosynthesis	COG2723	Beta-glucosidase/6-phospho-beta-glucosidase/beta-galactosidase	[G]	METABOLISM	Carbohydrate transport and metabolism	KOG0626	Beta-glucosidase, lactase phlorizinhydrolase, and related proteins	[G]	METABOLISM	Carbohydrate transport and metabolism	G	COG2723	beta-glucosidase	Biological Process: carbohydrate metabolic process (GO:0005975);|Molecular Function: beta-glucosidase activity (GO:0008422);|Molecular Function: scopolin beta-glucosidase activity (GO:0102483);	GO:0005975,GO:0008422,GO:0102483	Biological Process: carbohydrate metabolic process|Molecular Function: beta-glucosidase activity|Molecular Function: scopolin beta-glucosidase activity	PF00232.18	Glycosyl hydrolase family 1
		1130a	circRNA_0587|Chr1D:367295343_367302752_-	49.2371	20.8039	2.28921	1.19485	3.3135	0.000921377	0.00100505	20.8039	0	49.2371	0	7410	7410	sense-overlapping	TraesCS1D03G0646900.1	Chr1D:367287135_367295407_-	protein NRT1/ PTR FAMILY 5.10-like isoform X1 [Aegilops tauschii subsp. tauschii]	Q0WP01|PTR9_ARATH	Protein NRT1/ PTR FAMILY 5.10 F12K8.12 OS=Arabidopsis thaliana (Mouse-ear cress) GN=NPF5.10,At1g22540,F12K8.12 PE=2 SV=1	--	--	--	--	--	--	COG3104	Dipeptide/tripeptide permease	[E]	METABOLISM	Amino acid transport and metabolism	KOG1237	H+/oligopeptide symporter	[E]	METABOLISM	Amino acid transport and metabolism	E	COG3104	transporter	Molecular Function: peptide:proton symporter activity (GO:0015333);|Cellular Component: integral component of membrane (GO:0016021);|Molecular Function: oligopeptide transmembrane transporter activity (GO:0035673);|Molecular Function: peptide transmembrane transporter activity (GO:1904680);	GO:0015333,GO:0016021,GO:0035673,GO:1904680	Molecular Function: peptide:proton symporter activity|Cellular Component: integral component of membrane|Molecular Function: oligopeptide transmembrane transporter activity|Molecular Function: peptide transmembrane transporter activity	PF00854.21,PF07690.16	POT family|Major Facilitator Superfamily
		1130a	circRNA_2127|Chr7A:730459110_730487308_+	41.9862	0	81.2221	6.3438	6.65599	2.81397e-11	1.7959e-10	0	0	0	41.9862	28199	27766	sense-overlapping	TraesCS7A03G1337400.1	Chr7A:730486157_730487677_+	catalase 3 [Triticum aestivum]	P55307|CATA1_HORVU	Catalase isozyme 1 CAT1 OS=Hordeum vulgare (Barley) GN=CAT1,.,. PE=2 SV=1	277/327(84.71)	K03781	katE, CAT, catB, srpA	catalase [EC:1.11.1.6]	ko00380|ko00630|ko04016|ko04146	Tryptophan metabolism|Glyoxylate and dicarboxylate metabolism|MAPK signaling pathway - plant|Peroxisome	COG0753	Catalase	[P]	METABOLISM	Inorganic ion transport and metabolism	KOG0047	Catalase	[P]	METABOLISM	Inorganic ion transport and metabolism	P	COG0753	Catalase	Molecular Function: catalase activity (GO:0004096);|Biological Process: response to oxidative stress (GO:0006979);|Cellular Component: glyoxysome (GO:0009514);|Molecular Function: heme binding (GO:0020037);|Biological Process: hydrogen peroxide catabolic process (GO:0042744);|Molecular Function: metal ion binding (GO:0046872);	GO:0004096,GO:0006979,GO:0009514,GO:0020037,GO:0042744,GO:0046872	Molecular Function: catalase activity|Biological Process: response to oxidative stress|Cellular Component: glyoxysome|Molecular Function: heme binding|Biological Process: hydrogen peroxide catabolic process|Molecular Function: metal ion binding	PF00199.19,PF06628.12	Catalase|Catalase-related immune-responsive
		1130a	circRNA_0750|Chr2A:20012686_20098308_-	71.5285	0	138.371	7.1124	8.52557	1.52054e-17	3.25091e-16	0	0	29.5423	41.9862	85623	82397	sense-overlapping	TraesCS2A03G0080300.1	Chr2A:20094442_20108697_-	hypothetical protein CFC21_014753 [Triticum aestivum]	Q9FGF0|PGML1_ARATH	Phosphoglycerate mutase-like protein 1 T12B11.5 OS=Arabidopsis thaliana (Mouse-ear cress) GN=.,At5g64460,T12B11.5 PE=2 SV=1	--	--	--	--	--	--	COG0406	Fructose-2,6-bisphosphatase	[G]	METABOLISM	Carbohydrate transport and metabolism	KOG4754	Predicted phosphoglycerate mutase	[G]	METABOLISM	Carbohydrate transport and metabolism	S	ENOG4111QJY	Phosphoglycerate mutase	Cellular Component: cytosol (GO:0005829);	GO:0005829	Cellular Component: cytosol	PF00300.22	Histidine phosphatase superfamily (branch 1)
	p134_30d vs p134_10d	miRNA	circRNA	case_value	control_value	FoldChange	log2FoldChange	z-score	pValue	qValue	Expression_P134_10d1	Expression_P134_10d2	Expression_P134_30d1	Expression_P134_30d2	genomic_length	circRNA_length	type	best.transcript	transcript_position	Description	Swissprot.id	Swissprot.annotation	KEGG.id	KO_id	gene	KEGG.description	pathway	pathway_description	COG.id	COG.defination	COG.code	COG.categories	COG.class	KOG.id	KOG.defination	KOG.code	KOG.categories	KOG.class	eggNOG.abbreviation	eggNOG.id	eggNOG.description	GO_dtabase	GO_id	GO_term	Pfam.IDs	Pfam.Description
		1122a	circRNA_1606|Chr5A:504372471_504384228_-	41.9862	0	11.2151	3.48737	4.55645	5.20244e-06	9.34428e-06	0	0	0	41.9862	11758	11171	sense-overlapping	TraesCS5A03G0720200.1	Chr5A:504382303_504387387_-	Beta-glucosidase 31 [Triticum urartu]	B7F7K7|BGL31_ORYSJ	Beta-glucosidase 31 OsJ_29984 OS=Oryza sativa subsp. japonica (Rice) GN=BGLU31,Os09g0511600,OsJ_29984 PE=2 SV=1	465/488(95.29)	K01188	E3.2.1.21	beta-glucosidase [EC:3.2.1.21]	ko00460|ko00500|ko00940	Cyanoamino acid metabolism|Starch and sucrose metabolism|Phenylpropanoid biosynthesis	COG2723	Beta-glucosidase/6-phospho-beta-glucosidase/beta-galactosidase	[G]	METABOLISM	Carbohydrate transport and metabolism	KOG0626	Beta-glucosidase, lactase phlorizinhydrolase, and related proteins	[G]	METABOLISM	Carbohydrate transport and metabolism	G	COG2723	beta-glucosidase	Biological Process: carbohydrate metabolic process (GO:0005975);|Molecular Function: beta-glucosidase activity (GO:0008422);|Molecular Function: scopolin beta-glucosidase activity (GO:0102483);	GO:0005975,GO:0008422,GO:0102483	Biological Process: carbohydrate metabolic process|Molecular Function: beta-glucosidase activity|Molecular Function: scopolin beta-glucosidase activity	PF00232.18	Glycosyl hydrolase family 1
		1122a	circRNA_0957|Chr2B:811045021_811094734_+	0	47.5851	0.00140335	-9.47691	-12.7758	2.2389e-37	2.6762e-36	47.5851	0	0	0	49714	49714	sense-overlapping	TraesCS2B03G1568900.1	Chr2B:811042584_811045390_+	uncharacterized protein LOC119366640 [Triticum dicoccoides]	--	--	--	--	--	--	--	--	--	--	--	--	--	--	--	--	--	--	S	ENOG41100C3	Protein of unknown function (DUF3727)	--	--	--	PF12527.8	Protein of unknown function (DUF3727)
		1122a	circRNA_1041|Chr3A:32362161_32362549_+	0	33.0474	0.00202069	-8.95094	-11.0155	3.21753e-28	2.0488e-27	0	33.0474	0	0	389	389	sense-overlapping	TraesCS3A03G0112800.1	Chr3A:32361908_32368399_+	hypothetical protein CFC21_033767 [Triticum aestivum]	O42895|YBQ2_SCHPO	Uncharacterized protein C115.02c SPBC115.02c OS=Schizosaccharomyces pombe (strain 972 / ATCC 24843) (Fission yeast) GN=.,.,SPBC115.02c PE=3 SV=1	--	--	--	--	--	--	COG1485	Predicted ATPase	[R]	POORLY CHARACTERIZED	General function prediction only	KOG2383	Predicted ATPase	[R]	POORLY CHARACTERIZED	General function prediction only	S	COG1485	AFG1 family ATPase	Molecular Function: ATP binding (GO:0005524);|Cellular Component: cytoplasm (GO:0005737);|Cellular Component: mitochondrion (GO:0005739);|Biological Process: protein quality control for misfolded or incompletely synthesized proteins (GO:0006515);|Biological Process: protein import into peroxisome matrix (GO:0016558);|Molecular Function: ATPase activity (GO:0016887);|Biological Process: proteolysi…	GO:0005524,GO:0005737,GO:0005739,GO:0006515,GO:0016558,GO:0016887,GO:0051603	Molecular Function: ATP binding|Cellular Component: cytoplasm|Cellular Component: mitochondrion|Biological Process: protein quality control for misfolded or incompletely synthesized proteins|Biological Process: protein import into peroxisome matrix|Molecular Function: ATPase activity|Biological Process: proteolysis involved in cellular protein catabolic process	PF03969.16	AFG1-like ATPase
		1130a	circRNA_0587|Chr1D:367295343_367302752_-	49.2371	0	13.1519	3.7172	5.05408	4.32473e-07	8.095e-07	0	0	49.2371	0	7410	7410	sense-overlapping	TraesCS1D03G0646900.1	Chr1D:367287135_367295407_-	protein NRT1/ PTR FAMILY 5.10-like isoform X1 [Aegilops tauschii subsp. tauschii]	Q0WP01|PTR9_ARATH	Protein NRT1/ PTR FAMILY 5.10 F12K8.12 OS=Arabidopsis thaliana (Mouse-ear cress) GN=NPF5.10,At1g22540,F12K8.12 PE=2 SV=1	--	--	--	--	--	--	COG3104	Dipeptide/tripeptide permease	[E]	METABOLISM	Amino acid transport and metabolism	KOG1237	H+/oligopeptide symporter	[E]	METABOLISM	Amino acid transport and metabolism	E	COG3104	transporter	Molecular Function: peptide:proton symporter activity (GO:0015333);|Cellular Component: integral component of membrane (GO:0016021);|Molecular Function: oligopeptide transmembrane transporter activity (GO:0035673);|Molecular Function: peptide transmembrane transporter activity (GO:1904680);	GO:0015333,GO:0016021,GO:0035673,GO:1904680	Molecular Function: peptide:proton symporter activity|Cellular Component: integral component of membrane|Molecular Function: oligopeptide transmembrane transporter activity|Molecular Function: peptide transmembrane transporter activity	PF00854.21,PF07690.16	POT family|Major Facilitator Superfamily
		1130a	circRNA_2127|Chr7A:730459110_730487308_+	41.9862	77.1106	0.0727209	-3.78149	-17.4154	6.30608e-68	2.57793e-66	0	77.1106	0	41.9862	28199	27766	sense-overlapping	TraesCS7A03G1337400.1	Chr7A:730486157_730487677_+	catalase 3 [Triticum aestivum]	P55307|CATA1_HORVU	Catalase isozyme 1 CAT1 OS=Hordeum vulgare (Barley) GN=CAT1,.,. PE=2 SV=1	277/327(84.71)	K03781	katE, CAT, catB, srpA	catalase [EC:1.11.1.6]	ko00380|ko00630|ko04016|ko04146	Tryptophan metabolism|Glyoxylate and dicarboxylate metabolism|MAPK signaling pathway - plant|Peroxisome	COG0753	Catalase	[P]	METABOLISM	Inorganic ion transport and metabolism	KOG0047	Catalase	[P]	METABOLISM	Inorganic ion transport and metabolism	P	COG0753	Catalase	Molecular Function: catalase activity (GO:0004096);|Biological Process: response to oxidative stress (GO:0006979);|Cellular Component: glyoxysome (GO:0009514);|Molecular Function: heme binding (GO:0020037);|Biological Process: hydrogen peroxide catabolic process (GO:0042744);|Molecular Function: metal ion binding (GO:0046872);	GO:0004096,GO:0006979,GO:0009514,GO:0020037,GO:0042744,GO:0046872	Molecular Function: catalase activity|Biological Process: response to oxidative stress|Cellular Component: glyoxysome|Molecular Function: heme binding|Biological Process: hydrogen peroxide catabolic process|Molecular Function: metal ion binding	PF00199.19,PF06628.12	Catalase|Catalase-related immune-responsive
	p25_10d vs p25_20d	miRNA	circRNA	case_value	control_value	FoldChange	log2FoldChange	z-score	pValue	qValue	Expression_P25_10d1	Expression_P25_10d2	Expression_P25_20d1	Expression_P25_20d2	genomic_length	circRNA_length	type	best.transcript	transcript_position	Description	Swissprot.id	Swissprot.annotation	KEGG.id	KO_id	gene	KEGG.description	pathway	pathway_description	COG.id	COG.defination	COG.code	COG.categories	COG.class	KOG.id	KOG.defination	KOG.code	KOG.categories	KOG.class	eggNOG.abbreviation	eggNOG.id	eggNOG.description	GO_dtabase	GO_id	GO_term	Pfam.IDs	Pfam.Description
		1122a	circRNA_1606|Chr5A:504372471_504384228_-	198.671	0	128.014	7.00016	11.6906	1.4235e-31	3.78809e-30	0	0	93.5115	105.159	11758	11171	sense-overlapping	TraesCS5A03G0720200.1	Chr5A:504382303_504387387_-	Beta-glucosidase 31 [Triticum urartu]	B7F7K7|BGL31_ORYSJ	Beta-glucosidase 31 OsJ_29984 OS=Oryza sativa subsp. japonica (Rice) GN=BGLU31,Os09g0511600,OsJ_29984 PE=2 SV=1	465/488(95.29)	K01188	E3.2.1.21	beta-glucosidase [EC:3.2.1.21]	ko00460|ko00500|ko00940	Cyanoamino acid metabolism|Starch and sucrose metabolism|Phenylpropanoid biosynthesis	COG2723	Beta-glucosidase/6-phospho-beta-glucosidase/beta-galactosidase	[G]	METABOLISM	Carbohydrate transport and metabolism	KOG0626	Beta-glucosidase, lactase phlorizinhydrolase, and related proteins	[G]	METABOLISM	Carbohydrate transport and metabolism	G	COG2723	beta-glucosidase	Biological Process: carbohydrate metabolic process (GO:0005975);|Molecular Function: beta-glucosidase activity (GO:0008422);|Molecular Function: scopolin beta-glucosidase activity (GO:0102483);	GO:0005975,GO:0008422,GO:0102483	Biological Process: carbohydrate metabolic process|Molecular Function: beta-glucosidase activity|Molecular Function: scopolin beta-glucosidase activity	PF00232.18	Glycosyl hydrolase family 1
		1122a	circRNA_0957|Chr2B:811045021_811094734_+	17.5265	23.9443	0.235823	-2.08422	-4.9907	6.01616e-07	1.12788e-06	23.9443	0	0	17.5265	49714	49714	sense-overlapping	TraesCS2B03G1568900.1	Chr2B:811042584_811045390_+	uncharacterized protein LOC119366640 [Triticum dicoccoides]	--	--	--	--	--	--	--	--	--	--	--	--	--	--	--	--	--	--	S	ENOG41100C3	Protein of unknown function (DUF3727)	--	--	--	PF12527.8	Protein of unknown function (DUF3727)
		1122a	circRNA_2309|Chr7D:608011186_608088547_+	0	71.8329	0.00224254	-8.80065	-11.3966	4.34525e-30	1.04069e-28	71.8329	0	0	0	77362	76943	sense-overlapping	TraesCS7D03G1181400.1	Chr7D:608008579_608012537_+	lysosomal Pro-X carboxypeptidase-like [Aegilops tauschii subsp. tauschii]	Q1PF50|EDA2_ARATH	Probable serine protease EDA2 T27K22.5 OS=Arabidopsis thaliana (Mouse-ear cress) GN=EDA2,At2g18080,T27K22.5 PE=2 SV=2	--	--	--	--	--	--	--	--	--	--	--	KOG2183	Prolylcarboxypeptidase (angiotensinase C)	[OR]	CELLULAR PROCESSES AND SIGNALING|POORLY CHARACTERIZED	Posttranslational modification, protein turnover, chaperones |General function prediction only	S	ENOG410Y38A	Lysosomal Pro-X	Cellular Component: extracellular region (GO:0005576);|Cellular Component: vacuole (GO:0005773);|Biological Process: proteolysis (GO:0006508);|Molecular Function: serine-type peptidase activity (GO:0008236);|Molecular Function: dipeptidyl-peptidase activity (GO:0008239);|Biological Process: megagametogenesis (GO:0009561);	GO:0005576,GO:0005773,GO:0006508,GO:0008236,GO:0008239,GO:0009561	Cellular Component: extracellular region|Cellular Component: vacuole|Biological Process: proteolysis|Molecular Function: serine-type peptidase activity|Molecular Function: dipeptidyl-peptidase activity|Biological Process: megagametogenesis	PF05577.12	Serine carboxypeptidase S28
	p25_10d vs p25_30d	miRNA	circRNA	case_value	control_value	FoldChange	log2FoldChange	z-score	pValue	qValue	Expression_P25_10d1	Expression_P25_10d2	Expression_P25_30d1	Expression_P25_30d2	genomic_length	circRNA_length	type	best.transcript	transcript_position	Description	Swissprot.id	Swissprot.annotation	KEGG.id	KO_id	gene	KEGG.description	pathway	pathway_description	COG.id	COG.defination	COG.code	COG.categories	COG.class	KOG.id	KOG.defination	KOG.code	KOG.categories	KOG.class	eggNOG.abbreviation	eggNOG.id	eggNOG.description	GO_dtabase	GO_id	GO_term	Pfam.IDs	Pfam.Description
		1122a	circRNA_1606|Chr5A:504372471_504384228_-	271.396	0	174.302	7.44545	13.4486	3.13764e-41	1.23869e-39	0	0	139.743	131.653	11758	11171	sense-overlapping	TraesCS5A03G0720200.1	Chr5A:504382303_504387387_-	Beta-glucosidase 31 [Triticum urartu]	B7F7K7|BGL31_ORYSJ	Beta-glucosidase 31 OsJ_29984 OS=Oryza sativa subsp. japonica (Rice) GN=BGLU31,Os09g0511600,OsJ_29984 PE=2 SV=1	465/488(95.29)	K01188	E3.2.1.21	beta-glucosidase [EC:3.2.1.21]	ko00460|ko00500|ko00940	Cyanoamino acid metabolism|Starch and sucrose metabolism|Phenylpropanoid biosynthesis	COG2723	Beta-glucosidase/6-phospho-beta-glucosidase/beta-galactosidase	[G]	METABOLISM	Carbohydrate transport and metabolism	KOG0626	Beta-glucosidase, lactase phlorizinhydrolase, and related proteins	[G]	METABOLISM	Carbohydrate transport and metabolism	G	COG2723	beta-glucosidase	Biological Process: carbohydrate metabolic process (GO:0005975);|Molecular Function: beta-glucosidase activity (GO:0008422);|Molecular Function: scopolin beta-glucosidase activity (GO:0102483);	GO:0005975,GO:0008422,GO:0102483	Biological Process: carbohydrate metabolic process|Molecular Function: beta-glucosidase activity|Molecular Function: scopolin beta-glucosidase activity	PF00232.18	Glycosyl hydrolase family 1
		1122a	circRNA_0957|Chr2B:811045021_811094734_+	21.9422	23.9443	0.294271	-1.76478	-4.47194	7.75128e-06	1.17303e-05	23.9443	0	0	21.9422	49714	49714	sense-overlapping	TraesCS2B03G1568900.1	Chr2B:811042584_811045390_+	uncharacterized protein LOC119366640 [Triticum dicoccoides]	--	--	--	--	--	--	--	--	--	--	--	--	--	--	--	--	--	--	S	ENOG41100C3	Protein of unknown function (DUF3727)	--	--	--	PF12527.8	Protein of unknown function (DUF3727)
		1122a	circRNA_2309|Chr7D:608011186_608088547_+	0	71.8329	0.0022352	-8.80538	-11.4076	3.83276e-30	8.81049e-29	71.8329	0	0	0	77362	76943	sense-overlapping	TraesCS7D03G1181400.1	Chr7D:608008579_608012537_+	lysosomal Pro-X carboxypeptidase-like [Aegilops tauschii subsp. tauschii]	Q1PF50|EDA2_ARATH	Probable serine protease EDA2 T27K22.5 OS=Arabidopsis thaliana (Mouse-ear cress) GN=EDA2,At2g18080,T27K22.5 PE=2 SV=2	--	--	--	--	--	--	--	--	--	--	--	KOG2183	Prolylcarboxypeptidase (angiotensinase C)	[OR]	CELLULAR PROCESSES AND SIGNALING|POORLY CHARACTERIZED	Posttranslational modification, protein turnover, chaperones |General function prediction only	S	ENOG410Y38A	Lysosomal Pro-X	Cellular Component: extracellular region (GO:0005576);|Cellular Component: vacuole (GO:0005773);|Biological Process: proteolysis (GO:0006508);|Molecular Function: serine-type peptidase activity (GO:0008236);|Molecular Function: dipeptidyl-peptidase activity (GO:0008239);|Biological Process: megagametogenesis (GO:0009561);	GO:0005576,GO:0005773,GO:0006508,GO:0008236,GO:0008239,GO:0009561	Cellular Component: extracellular region|Cellular Component: vacuole|Biological Process: proteolysis|Molecular Function: serine-type peptidase activity|Molecular Function: dipeptidyl-peptidase activity|Biological Process: megagametogenesis	PF05577.12	Serine carboxypeptidase S28
		1122a	circRNA_1938|Chr6B:449321369_449325235_-	46.581	0	29.9163	4.90286	5.69982	1.19931e-08	2.3219e-08	0	0	46.581	0	3867	3867	sense-overlapping	TraesCS6B03G0728300.1	Chr6B:449322599_449322880_-	unnamed protein product [Triticum turgidum subsp. durum]	B5X0I6|VIP6_ARATH	Protein CTR9 homolog At2g06210 OS=Arabidopsis thaliana (Mouse-ear cress) GN=VIP6,At2g06210,. PE=1 SV=1	--	--	--	--	--	--	--	--	--	--	--	KOG2002	TPR-containing nuclear phosphoprotein that regulates K(+) uptake	[P]	METABOLISM	Inorganic ion transport and metabolism	S	COG0457	repeat-containing protein	Molecular Function: RNA polymerase II complex binding (GO:0000993);|Cellular Component: nucleus (GO:0005634);|Biological Process: flower development (GO:0009908);|Biological Process: negative regulation of flower development (GO:0009910);|Cellular Component: membrane (GO:0016020);|Biological Process: histone methylation (GO:0016571);|Cellular Component: Cdc73/Paf1 complex (GO:0016593);|Biological…	GO:0000993,GO:0005634,GO:0009908,GO:0009910,GO:0016020,GO:0016571,GO:0016593,GO:0045893,GO:0051569	Molecular Function: RNA polymerase II complex binding|Cellular Component: nucleus|Biological Process: flower development|Biological Process: negative regulation of flower development|Cellular Component: membrane|Biological Process: histone methylation|Cellular Component: Cdc73/Paf1 complex|Biological Process: positive regulation of transcription, DNA-templated|Biological Process: regulation of hi…	--	--
		1130a	circRNA_0586|Chr1D:367294993_367308917_-	34.9357	0	22.4372	4.48782	4.85524	1.20242e-06	2.02936e-06	0	0	34.9357	0	13925	13813	sense-overlapping	TraesCS1D03G0646900.1	Chr1D:367287135_367295407_-	protein NRT1/ PTR FAMILY 5.10-like isoform X1 [Aegilops tauschii subsp. tauschii]	Q0WP01|PTR9_ARATH	Protein NRT1/ PTR FAMILY 5.10 F12K8.12 OS=Arabidopsis thaliana (Mouse-ear cress) GN=NPF5.10,At1g22540,F12K8.12 PE=2 SV=1	--	--	--	--	--	--	COG3104	Dipeptide/tripeptide permease	[E]	METABOLISM	Amino acid transport and metabolism	KOG1237	H+/oligopeptide symporter	[E]	METABOLISM	Amino acid transport and metabolism	E	COG3104	transporter	Molecular Function: peptide:proton symporter activity (GO:0015333);|Cellular Component: integral component of membrane (GO:0016021);|Molecular Function: oligopeptide transmembrane transporter activity (GO:0035673);|Molecular Function: peptide transmembrane transporter activity (GO:1904680);	GO:0015333,GO:0016021,GO:0035673,GO:1904680	Molecular Function: peptide:proton symporter activity|Cellular Component: integral component of membrane|Molecular Function: oligopeptide transmembrane transporter activity|Molecular Function: peptide transmembrane transporter activity	PF00854.21,PF07690.16	POT family|Major Facilitator Superfamily
	p25_20d vs p25_30d	miRNA	circRNA	case_value	control_value	FoldChange	log2FoldChange	z-score	pValue	qValue	Expression_P25_20d1	Expression_P25_20d2	Expression_P25_30d1	Expression_P25_30d2	genomic_length	circRNA_length	type	best.transcript	transcript_position	Description	Swissprot.id	Swissprot.annotation	KEGG.id	KO_id	gene	KEGG.description	pathway	pathway_description	COG.id	COG.defination	COG.code	COG.categories	COG.class	KOG.id	KOG.defination	KOG.code	KOG.categories	KOG.class	eggNOG.abbreviation	eggNOG.id	eggNOG.description	GO_dtabase	GO_id	GO_term	Pfam.IDs	Pfam.Description
		1122a	circRNA_1606|Chr5A:504372471_504384228_-	271.396	198.671	1.36159	0.445292	3.3295	0.000870008	0.00142978	93.5115	105.159	139.743	131.653	11758	11171	sense-overlapping	TraesCS5A03G0720200.1	Chr5A:504382303_504387387_-	Beta-glucosidase 31 [Triticum urartu]	B7F7K7|BGL31_ORYSJ	Beta-glucosidase 31 OsJ_29984 OS=Oryza sativa subsp. japonica (Rice) GN=BGLU31,Os09g0511600,OsJ_29984 PE=2 SV=1	465/488(95.29)	K01188	E3.2.1.21	beta-glucosidase [EC:3.2.1.21]	ko00460|ko00500|ko00940	Cyanoamino acid metabolism|Starch and sucrose metabolism|Phenylpropanoid biosynthesis	COG2723	Beta-glucosidase/6-phospho-beta-glucosidase/beta-galactosidase	[G]	METABOLISM	Carbohydrate transport and metabolism	KOG0626	Beta-glucosidase, lactase phlorizinhydrolase, and related proteins	[G]	METABOLISM	Carbohydrate transport and metabolism	G	COG2723	beta-glucosidase	Biological Process: carbohydrate metabolic process (GO:0005975);|Molecular Function: beta-glucosidase activity (GO:0008422);|Molecular Function: scopolin beta-glucosidase activity (GO:0102483);	GO:0005975,GO:0008422,GO:0102483	Biological Process: carbohydrate metabolic process|Molecular Function: beta-glucosidase activity|Molecular Function: scopolin beta-glucosidase activity	PF00232.18	Glycosyl hydrolase family 1
		1122a	circRNA_0957|Chr2B:811045021_811094734_+	21.9422	17.5265	1.24785	0.319441	0.693405	0.488055	0.544567	0	17.5265	0	21.9422	49714	49714	sense-overlapping	TraesCS2B03G1568900.1	Chr2B:811042584_811045390_+	uncharacterized protein LOC119366640 [Triticum dicoccoides]	--	--	--	--	--	--	--	--	--	--	--	--	--	--	--	--	--	--	S	ENOG41100C3	Protein of unknown function (DUF3727)	--	--	--	PF12527.8	Protein of unknown function (DUF3727)
		1122a	circRNA_1938|Chr6B:449321369_449325235_-	46.581	0	92.8569	6.53694	7.03866	1.94099e-12	2.49388e-11	0	0	46.581	0	3867	3867	sense-overlapping	TraesCS6B03G0728300.1	Chr6B:449322599_449322880_-	unnamed protein product [Triticum turgidum subsp. durum]	B5X0I6|VIP6_ARATH	Protein CTR9 homolog At2g06210 OS=Arabidopsis thaliana (Mouse-ear cress) GN=VIP6,At2g06210,. PE=1 SV=1	--	--	--	--	--	--	--	--	--	--	--	KOG2002	TPR-containing nuclear phosphoprotein that regulates K(+) uptake	[P]	METABOLISM	Inorganic ion transport and metabolism	S	COG0457	repeat-containing protein	Molecular Function: RNA polymerase II complex binding (GO:0000993);|Cellular Component: nucleus (GO:0005634);|Biological Process: flower development (GO:0009908);|Biological Process: negative regulation of flower development (GO:0009910);|Cellular Component: membrane (GO:0016020);|Biological Process: histone methylation (GO:0016571);|Cellular Component: Cdc73/Paf1 complex (GO:0016593);|Biological…	GO:0000993,GO:0005634,GO:0009908,GO:0009910,GO:0016020,GO:0016571,GO:0016593,GO:0045893,GO:0051569	Molecular Function: RNA polymerase II complex binding|Cellular Component: nucleus|Biological Process: flower development|Biological Process: negative regulation of flower development|Cellular Component: membrane|Biological Process: histone methylation|Cellular Component: Cdc73/Paf1 complex|Biological Process: positive regulation of transcription, DNA-templated|Biological Process: regulation of hi…	--	--
		1130a	circRNA_0586|Chr1D:367294993_367308917_-	34.9357	0	69.6427	6.1219	6.13431	8.55293e-10	5.27483e-09	0	0	34.9357	0	13925	13813	sense-overlapping	TraesCS1D03G0646900.1	Chr1D:367287135_367295407_-	protein NRT1/ PTR FAMILY 5.10-like isoform X1 [Aegilops tauschii subsp. tauschii]	Q0WP01|PTR9_ARATH	Protein NRT1/ PTR FAMILY 5.10 F12K8.12 OS=Arabidopsis thaliana (Mouse-ear cress) GN=NPF5.10,At1g22540,F12K8.12 PE=2 SV=1	--	--	--	--	--	--	COG3104	Dipeptide/tripeptide permease	[E]	METABOLISM	Amino acid transport and metabolism	KOG1237	H+/oligopeptide symporter	[E]	METABOLISM	Amino acid transport and metabolism	E	COG3104	transporter	Molecular Function: peptide:proton symporter activity (GO:0015333);|Cellular Component: integral component of membrane (GO:0016021);|Molecular Function: oligopeptide transmembrane transporter activity (GO:0035673);|Molecular Function: peptide transmembrane transporter activity (GO:1904680);	GO:0015333,GO:0016021,GO:0035673,GO:1904680	Molecular Function: peptide:proton symporter activity|Cellular Component: integral component of membrane|Molecular Function: oligopeptide transmembrane transporter activity|Molecular Function: peptide transmembrane transporter activity	PF00854.21,PF07690.16	POT family|Major Facilitator Superfamily
